# Supplementary material
Source: Elsevier journal article supplement (https://www.sciencedirect.com/science/article/pii/S2341287919302285)
Supplement: mmc1 [file S2341287919302285:mmc1.pdf]

# RECOMENDACIONES DE LA SOCIEDAD ESPAÑOLA DE CARDIOLOGIA PEDIATRICA Y CARDIOPATIAS CONGENITAS EN RELACION AL USO DE MEDICAMENTOS EN EL TRASTORNO POR DÉFICIT DE ATENCIÓN E HIPERACTIVIDAD EN NIÑOS Y ADOLESCENTES CON CARDIOPATIAS CONOCIDAS Y EN LA POBLACIÓN PEDIATRICA GENERAL, POSICIONAMIENTO DE LA ASOCIACIÓN ESPAÑOLA DE PEDIATRIA

## AUTORES

Javier Pérez-Lescure Picarzo<sup>a k</sup>, (resto de autores por orden alfabético) Fernando Centeno Malfaz<sup>b l</sup>, David Crespo Marcos<sup>a l</sup>, Rosa Collell Hernández<sup>c l</sup>, Teresa Fernández Soria<sup>a l</sup>, Begoña Manso García<sup>d l</sup>, Henar Rojo Sombrero<sup>e l</sup>, Anna Sabaté Rotés<sup>f l</sup>, Georgia Sarquella-Brugada<sup>g h i j k m</sup>

<sup>a</sup> Servicio de Pediatría, Cardiología Infantil, Hospital Universitario Fundación Alcorcón, Alcorcón, Madrid, España

<sup>b</sup> Servicio de Pediatría, Cardiología Infantil, Hospital Universitario Río Hortega Valladolid, España,

<sup>c</sup> Servicio de Pediatría, Cardiología Infantil, Hospital Universitari Sant Joan de Reus, Tarragona

<sup>d</sup> Servicio de Pediatría, Cardiología Infantil, Hospital Universitario Virgen del Rocío, Sevilla,

<sup>e</sup> Servicio de Pediatría, Cardiología Infantil, Hospital Universitario Príncipe de Asturias, Alcalá de Henares, Madrid,

<sup>f</sup> Cardiología Infantil, Hospital Universitari Vall d'Hebron, Barcelona,

<sup>g</sup> Unidad de Arritmias, Cardiopatías Familiares y Muerte Súbita, Hospital Sant Joan de Déu Barcelona

<sup>h</sup> Departamento de Ciencias Médicas, Facultad de Medicina, Universidad de Girona

<sup>i</sup> Recerca Cardiovascular, Institut de Recerca, Fundació Sant Joan de Déu

<sup>j</sup> Guard-Heart, European Reference Center

<sup>k</sup> Junta Directiva Sociedad Española de Cardiología Pediátrica y Cardiopatías Congénitas

<sup>l</sup> Grupo de Cardiología Clínica de la Sociedad Española de Cardiología Pediátrica y Cardiopatías Congénitas

<sup>m</sup> Grupo de Arritmias de la Sociedad Española de Cardiología Pediátrica y Cardiopatías Congénitas

## ANEXO 1

**Agencia Española del Medicamento.** Almudena López Fando. División Farmacoepidemiología y Farmacovigilancia. Departamento de Medicamentos de Uso Humano

**Sociedad Española de Cardiología.** Inmaculada Sánchez Cardiología Infantil Hospital Ramón y Cajal Madrid

**Sociedad Española de Psiquiatría.** José Antonio Ramos Quiroga. Coordinador del Programa de Trastorno por Déficit de Atención con Hiperactividad (TDAH) y Coordinador de las Urgencias del Servicio de Psiquiatría. Hospital Universitari Vall d'Hebron, Barcelona .

**Sociedad Española de Farmacología Clínica.** Belén Ruiz Antorán, miembro del grupo de expertos de la Agencia Europea del Medicamento Servicio de Farmacología Clínica Hospital Puerta de Hierro , Madrid

**Sociedad de Psiquiatría Infantil de la Asociación Española de Pediatría.** Azucena Díez Suárez. Unidad de Psiquiatría Infantil y Adolescente de la Clínica Universidad de Navarra.

**Asociación Española de Pediatría Grupo de Trabajo de Pediatría Basada en la Evidencia** Carlos Ochoa Sangrador, Hospital Virgen de la Concha, Zamora.

**Sociedad Española de Neurología Pediátrica** Francisco Javier López Pisón. Neurología Infantil, Hospital Miguel Servet, Zaragoza.

**Asociación Española de Pediatría de Atención Primaria (AEPap)** José Miguel García Cruz Coordinador del Grupo de TDAH y Desarrollo Psicoeducativo de la AEPap.

**Sociedad Española de Pediatría Extrahospitalaria y Atención Primaria** Adrián García Ron. Neurología Infantil Hospital Clínico San Carlos, Madrid.

## **ANEXO 2**

**Sociedad Española de Cardiología Pediátrica y Cardiopatías Congénitas** Elena Montañés Delmas. Cardiología Infantil Hospital 12 Octubre, Madrid

**Sociedad Española de Cardiología Pediátrica y Cardiopatías Congénitas** Miguel Ángel Granados Ruiz. Cardiología Infantil Hospital 12 Octubre, Madrid

**Sociedad Española de Cardiología Pediátrica y Cardiopatías Congénitas** María del Mar Rodríguez Vázquez del Rey. Cardiología Infantil Hospital Virgen de las Nieves, Granada

## 1. INTRODUCCIÓN

El trastorno por déficit de atención con hiperactividad (TDAH) es una alteración del neurodesarrollo que se inicia habitualmente en la infancia con un patrón persistente de síntomas de inatención, hiperactividad e impulsividad (DSM-5)<sup>1</sup>. Para realizar el diagnóstico, los síntomas deben estar presentes en un grado mayor de lo que cabría esperar para la misma edad y sexo, en más de un entorno (familiar, escolar y/o laboral), y deben tener un impacto negativo en su funcionamiento. Más de dos tercios de los pacientes asocian además otros trastornos psiquiátricos, como ansiedad, depresión, trastorno negativista-desafiante, trastornos del aprendizaje o consumo de tóxicos. Su etiología es multifactorial, siendo muy relevantes los factores genéticos, y también algunos factores ambientales como el consumo de tabaco o alcohol de la madre durante el embarazo o la prematuridad<sup>2</sup>. Las principales disfunciones neurobiológicas se ubican en los sistemas dopaminérgico y noradrenérgico, que modulan las funciones ejecutivas, y son dianas de los principales tratamientos farmacológicos indicados para el TDAH.

El abordaje del TDAH es multimodal e incluye: terapia cognitivo-conductual, tratamiento farmacológico, entrenamiento en habilidades sociales, refuerzo y enfoque del aprendizaje escolar, asesoramiento y formación de los padres, y colaboración con el colegio.

El tratamiento farmacológico y/o psicológico se debe considerar para el TDAH en niños y adolescentes teniendo en cuenta la edad, la gravedad de los síntomas, la repercusión funcional y las características y preferencias de la familia. En general en niños y niñas en edad escolar y adolescentes se recomienda el tratamiento farmacológico cuando el tratamiento psicológico cognitivo-conductual no ha dado resultados y/o en aquellos con afectación moderada-grave.

Los fármacos aprobados para el TDAH en España son: metilfenidato, lisdexanfetamina, atomoxetina y guanfacina. Se trata de fármacos con efectividad y seguridad probadas. Debido a los efectos adversos cardio-vasculares que puede producir, principalmente aumento de la tensión arterial y la frecuencia cardiaca, su uso en pacientes con cardiopatías congénitas conocidas o no diagnosticadas puede ser controvertido.

En la mayor parte de los estudios publicados que determinan los efectos secundarios de la medicación en niños y adolescentes con TDAH la calidad de la evidencia y su fiabilidad es baja por debilidades en el diseño.

En la ficha técnica de los fármacos estimulantes no se recomienda su uso en niños o adolescentes con “anomalías cardíacas estructurales conocidas, cardiomiopatía, arritmias u otros problemas cardíacos”. Esto puede plantear a los psiquiatras, pediatras o neurólogos infantiles, dudas en relación a cómo saber si el niño tiene una enfermedad cardíaca o qué hacer si el niño tiene una enfermedad cardíaca

diagnosticada o una enfermedad cardíaca relacionada con MSC. En ocasiones estos pacientes son remitidos al cardiólogo infantil dejando a su criterio la posibilidad de tratamiento.

La no prescripción de la medicación ante cardiopatías leves pueden privar a los pacientes del beneficio del tratamiento y por otro lado ante la duda, se pueden remitir niños sanos y asintomáticos a las consultas de cardiología para descartar patología cardíaca antes de iniciar el tratamiento, con el correspondiente sobrecoste resultante.

Es muy difícil estimar con precisión los riesgos del tratamiento con medicamentos para el TDAH en niños con cardiopatías congénitas conocidas o no diagnosticadas por lo que es fundamental poder detectar los pacientes con mayor riesgo de efectos secundarios graves evaluando la relación riesgo beneficio del tratamiento.

**Palabras clave:** TDAH, metilfenidato, atomoxetina, lisdexanfetamina, guanfacina, efectos secundarios cardiovasculares, muerte súbita, cardiopatías congénitas, cardiopatías adquiridas.

## **2. OBJETIVO DE ESTAS RECOMENDACIONES**

El objetivo de estas recomendaciones es realizar un documento de consenso de la Sociedad Española de Cardiología Pediátrica y Cardiopatías Congénitas (SECPCC) basado en la evidencia actual como instrumento para el cardiólogo infantil y los médicos que tratan niños y adolescentes con TDAH en la toma de decisiones tratando de responder a las siguientes preguntas:

1. ¿Cuál es la evaluación prudente para garantizar la seguridad del uso de medicamentos para el TDAH en la población pediátrica general, así como en pacientes con enfermedades cardíacas congénitas o adquiridas conocidas?
2. ¿Hay cardiopatías específicas que supongan una contraindicación absoluta para el uso de medicamentos para el TDAH?
3. ¿Se puede establecer una recomendación específica por tipo de cardiopatía en relación con el uso de medicamentos para el TDAH?
4. ¿Qué seguimiento cardiológico se debe realizar en niños cardiopatas que siguen tratamiento con medicamentos para el TDAH?

### **3. METODOLOGÍA**

Análisis de la bibliografía y Guías de Práctica Clínica internacionales disponibles en las bases de datos (PubMed/MEDLINE, IME, IBECS), de fichas técnicas aprobadas por la Agencia Española del Medicamento y Productos Sanitarios y Guía del Ministerio de Sanidad español que forma parte del Plan de Calidad para el Sistema Nacional de Salud.

Formación de un Grupo de trabajo con un Coordinador, miembros del grupo de trabajo de Cardiología Clínica y del Grupo de Arritmias de la SECPCC con experiencia clínica relevante sobre el tema. Este Grupo realizó una primera versión del documento que fue revisado por un grupo de expertos externos (ANEXO 1) y un grupo de expertos internos de la SECPCC (ANEXO 2) llegando a un consenso para la obtención del documento final.

#### **4. PREVALENCIA DEL TDAH EN LA POBLACIÓN GENERAL Y EN NIÑOS y ADOLESCENTES CON ENFERMEDAD CARDIOVASCULAR**

Se estima una prevalencia global para el TDAH entre el 1,4% y el 5%<sup>3,4</sup> teniendo los niños entre dos y cuatro veces más probabilidades de ser diagnosticados que las niñas<sup>5</sup>. Aunque afecta a pacientes desde la edad preescolar hasta la vida adulta, el diagnóstico suele realizarse entre los 6 y los 9 años de edad, momento en que el aumento de las exigencias académicas precisa de un buen nivel atencional y/o el estado de actividad inapropiado para la edad llama definitivamente la atención de los maestros<sup>6</sup>. La prevalencia en España del TDAH en población menor de 18 años en el año 2012 se ha estimado en un 6,8%<sup>7</sup> representado 361.580 niños y adolescentes.

Existe evidencia de una mayor prevalencia de TDAH en niños con cardiopatías congénitas graves<sup>8,9</sup> como el síndrome de ventrículo izquierdo hipoplásico y en caso de cirugía cardíaca en edades tempranas<sup>10</sup>.

## 5. MEDICAMENTOS APROBADOS EN ESPAÑA PARA EL TDAH

### 5.1 Estimulantes

**5.1.1 Metilfenidato.** Es una molécula estimulante del sistema nervioso central, actúa bloqueando los transportadores de dopamina y de noradrenalina, inhibe la monoamino-oxidasa y aumenta la liberación de catecolaminas. Especialmente actúa sobre los receptores D1 de la corteza prefrontal y sobre los receptores D2 del núcleo estriado. La dosis eficaz en niños varía entre 1 y 2 mg por kilo de peso y día, pero debe ajustarse individualmente. Hay presentaciones de acción corta (Rubifén®, Medicebrán®) con efecto de 4 horas; acción intermedia (Medikinet®, Equasym®) con efecto de 8-9 horas; y acción prolongada (Concerta®, Rubicrono®) con efecto durante 10-12 horas. El metilfenidato está indicado como parte de un programa de tratamiento integral del TDAH en niños a partir de 6 años cuando otras medidas, por sí mismas, han demostrado ser insuficientes.

**5.1.2 Lisdexanfetamina** (Elvanse®). Es un profármaco inactivo compuesto por dextroanfetamina y L-lisina que tras su absorción en el tracto digestivo libera dexanfetamina que tendría un mecanismo de acción similar al metilfenidato. Esta aumenta la liberación de dopamina y en menor medida de noradrenalina y bloquea la recaptación de ambos neurotransmisores. La dosis varía entre 30-70 mg/día y la duración del efecto es de 13 horas. La lisdexanfetamina está indicada como parte de un programa de tratamiento integral para el TDAH en niños a partir de 6 años, cuando la respuesta al tratamiento previo con metilfenidato o atomoxetina se considere clínicamente inadecuado.

### 5.2 No estimulantes

**5.2.1 Atomoxetina** (Strattera®). Es un inhibidor selectivo de la recaptación de noradrenalina que incrementa los niveles de dopamina de forma indirecta. Se metaboliza en el hígado y se excreta fundamentalmente por orina, las medicaciones que inhiben el P450 2d6 como fluoxetina, paroxetina y quinidina, elevan los niveles de atomoxetina. La dosis eficaz habitual es de 1,2 mg/kg/día. Se recomienda empezar con 0,5 mg/kg/día y tras una o dos semanas, según tolerancia, subir a 1,2 mg/kg/día Su vida media plasmática es de unas 5 horas en metabolizadores rápidos, y 22 horas en metabolizadores lentos. La atomoxetina está indicada en el tratamiento del trastorno por déficit de atención con hiperactividad (TDAH) en niños a partir de los 6 años, en adolescentes y en adultos como parte de un programa completo de tratamiento.

**5.2.2 Guanfacina** (Intuniv®). Es un agonista alfa-2-adrenérgico postsináptico, modula la liberación de noradrenalina actuando como agonista parcial. Con un mecanismo de acción similar a la clonidina, sin embargo, la unión más selectiva de la guanfacina a los receptores adrenérgicos parece responsable de una menor actividad hipotensora en comparación a la clonidina. Las investigaciones preclínicas sugieren que su actividad en



el TDAH se produciría por modulación de la señalización en la corteza prefrontal y los ganglios basales mediante la modificación directa de la transmisión sináptica de noradrenalina en los receptores adrenérgicos alfa 2. Se debe personalizar la dosis según la respuesta y tolerabilidad del paciente, la dosis recomendada en niños es de 1-4 mg/día y en adolescentes 1-7 mg/día. La guanfacina está indicada para el tratamiento del trastorno por déficit de atención e hiperactividad (TDAH) en niños y adolescentes de 6 a 17 años cuando los estimulantes no son adecuados, no se toleran o han mostrado ser ineficaces.

## **6. Efectos cardiovasculares descritos de los fármacos utilizados en el TDAH**

### **6.1. Efectos sobre la TA y la frecuencia cardiaca**

#### **6.1.1 Psicoestimulantes (metilfenidato, lisdexanfetamina) y Atomoxetina**

Los estimulantes y la atomoxetina son fármacos simpaticomiméticos que aumentan la transmisión noradrenérgica y dopaminérgica lo que produce efectos sobre la frecuencia cardiaca y la tensión arterial<sup>11,12</sup>. La magnitud de estos efectos es variable y viene influida por el propio fármaco, la dosis, la respuesta individual de cada paciente y las interacciones con otros fármacos<sup>13</sup>.

Se han observado pequeños aumentos de tensión arterial y frecuencia cardiaca estadísticamente significativos, pero clínicamente poco relevantes<sup>11,12,14,15</sup>. Estos aumentos varían en función de las series publicadas, en promedio producen un aumento de 3-10 lpm de la frecuencia cardiaca<sup>14,16</sup>, de 3-8 mmHg sobre la tensión arterial sistólica (TAS) y de 2-14 mmHg sobre la tensión arterial diastólica (TAD)<sup>13,16,17</sup>.

Una revisión sistemática<sup>16</sup> publicada en 2011 sobre los efectos cardiovasculares de los psicoestimulantes y la atomoxetina, concluyó que un 5-15% de los pacientes presentaban aumentos mayores de la frecuencia cardiaca y la TA con un aumento de la TA >p95 para edad y talla y/o un cambio clínicamente significativo de la TAS (> 20 mmHg) y TAD (>10mmHg) con respecto a la basal o ascensos por encima de 25 lpm de la frecuencia cardiaca basal.

En 2018, se publicó un metaanálisis<sup>15</sup>, que incluyó 22 estudios, 18 de ellos ensayos clínicos controlados aleatorizados, comparativos entre metilfenidato y atomoxetina incluyendo pacientes menores y adultos. Concluyeron que ambos fármacos producen aumentos clínicamente significativos en la frecuencia cardiaca y la TAS en comparación con placebo. La atomoxetina causó aumentos significativos y mayores en la frecuencia cardiaca y la TAS al compararlo con el metilfenidato.

En resumen, estos estudios acreditan la existencia de cambios significativos en frecuencia cardiaca y TA, aunque las variaciones son pequeñas. La mayoría de los trabajos son estudios a corto plazo y/o durante el ajuste de la dosis.

Los efectos a largo plazo no están bien descritos, aunque algunos estudios sugieren que el aumento de la TA y la frecuencia cardiaca se mantienen con el tiempo. En un metaanálisis<sup>11</sup> de 2017 que incluyó 18 estudios, evaluaron los efectos cardiovasculares del metilfenidato, anfetaminas y atomoxetina en 5837 niños y adolescentes con TDAH durante un periodo medio de 28.7 semanas (4-96 semanas) concluyendo que los tres fármacos se asociaron de forma significativa con una TAS media más elevada. La TAD media y la frecuencia cardiaca fue significativamente mayor para los grupos tratados con anfetaminas o atomoxetina, pero no para el metilfenidato. La mayoría de los

estudios en este metaanálisis fueron abiertos sin grupo placebo (80%) y solo 5 fueron aleatorizados.

Faltan estudios que evalúen la implicación de estos pequeños aumentos de la TA y la frecuencia cardíaca a largo plazo (>24 meses), como factor de riesgo en el desarrollo de enfermedad cardiovascular en la vida adulta<sup>18,19,20</sup>. Se ha realizado un estudio, ADDUCE (*Attention Deficit Hyperactivity Disorder Drugs Use Chronic Effects*), que compara el registro de 24 horas de TA y la masa del ventrículo izquierdo medidas mediante ecocardiogramas en adolescentes y adultos jóvenes con TDAH que han estado en tratamiento estimulante durante 3 años o más con un grupo control pendiente en este momento de publicar las conclusiones definitivas (<http://www.adhd-adduce.org>).

Se ha descrito<sup>21</sup> que los pacientes tratados con estimulantes tienen una función autonómica alterada (mayor frecuencia cardíaca, TA y mayor variabilidad de la frecuencia cardíaca) y una mayor rigidez arterial (mayor velocidad de la onda del pulso carotideo-radial, mayor índice de aumento de la arteria carótida) frente a un grupo control. Estos resultados pueden ser de interés como generadores de nuevas hipótesis sobre los efectos de estos medicamentos en el desarrollo de enfermedad cardiovascular. Tanto la rigidez arterial como la disfunción endotelial son predictores independientes de enfermedad cardiovascular en adultos.

Los cambios en la frecuencia cardíaca y tensión arterial que produce la Atomoxetina ocurren con mayor probabilidad durante el ajuste de la dosis, se estabilizan con el tiempo y disminuyen de forma gradual con el cese de la medicación<sup>22</sup>.

Los pacientes metabolizadores lentos del P450 2D6 (CYP2D6), hasta 7% de la población caucásica, pueden tener cambios mayores sobre la TA y la frecuencia cardíaca,<sup>18,23</sup> queda por esclarecer cómo puede afectar la eficacia, seguridad y tolerabilidad, ya que hay pocos estudios que analicen este factor modificador.

### **6.1.2 Guanfacina**

La guanfacina activa los receptores alfa 2 adrenérgicos centrales, inhibiendo el sistema nervioso simpático, lo que reduce la resistencia vascular periférica, renal, la frecuencia cardíaca y la TA<sup>12</sup>. Puede producir bradicardia e hipotensión.

La guanfacina, tanto en monoterapia como asociado a otros psicoestimulantes<sup>24</sup>, puede inducir una disminución leve-moderada de la TA (descensos de 5mmHg de la TAS y de 3 mmHg de la TAD) y la frecuencia cardíaca (6 lpm) sin significación clínica<sup>12</sup>. Para reducir el impacto de sus posibles efectos adversos, se recomienda una escalada lenta hasta conseguir la dosis indicada de 0,1 mg/kg/día, comenzando por 1 mg/día y aumentando 1 mg cada dos semanas.

Se han descrito casos de hipertensión de rebote e incluso de encefalopatía hipertensiva tras la suspensión brusca<sup>12,25</sup> por lo que la suspensión debe realizarse de forma gradual bajando 1 mg a la semana.

La combinación de terapia psicoestimulante con guanfacina no crea un impacto adverso adicional a nivel cardiovascular, incluso podría atenuar los cambios cardiovasculares observados con cualquiera en monoterapia<sup>14,24</sup>.

## 6.2. Efectos sobre el electrocardiograma

No hay evidencia de asociación entre el uso de fármacos para el tratamiento del TDAH y cambios clínicamente significativos en los parámetros electrocardiográficos, incluidos los intervalos PR, QRS y QT<sup>16,19</sup>.

La prolongación del intervalo QTc puede ser causada por varios medicamentos siendo un factor de riesgo conocido de taquiarritmias ventriculares y muerte súbita. Con los datos disponibles, no parece haber cambios clínicamente significativos en el intervalo QTc promedio con los grupos de medicamentos metilfenidato, sales mixtas de anfetamina y atomoxetina<sup>16,25,26</sup>. Sin embargo, hay un pequeño grupo de pacientes que tendrán una respuesta mayor, con un incremento en QTc por encima del umbral de seguridad generalmente aceptado como superior a 470–500 ms o ascensos > 60 ms con respecto al basal<sup>14</sup>.

En los pacientes metabolizadores lentos del CYP2D6 conforme aumenta la concentración plasmática de atomoxetina se han objetivado aumentos mayores del intervalo QTc. De igual forma se han descrito en casos de sobredosis de atomoxetina. Estos hallazgos no suelen asociarse con eventos adversos graves<sup>18,24</sup>.

Hay que tener en cuenta que muchos de los pacientes con TDAH pueden requerir otros psicofármacos que pueden alargar el intervalo QTc (Tabla 1)

| Tabla 1 Psicofármacos que pueden prolongar el intervalo QTc                                                                                                                                                                                      |
|--------------------------------------------------------------------------------------------------------------------------------------------------------------------------------------------------------------------------------------------------|
| Amitriptilina<br>Citalopram (ISRS)<br>Clorpromazina<br>Desipramina<br>Escitalopram (ISRS)<br>Fluoxetina (ISRS)<br>Fluvoxamina (ISRS)<br>Haloperidol<br>Hidroxicina<br>Imipramina<br>Levomepromazina<br>Litio<br>Paroxetina (ISRS)<br>Prometazina |

|                                                                 |
|-----------------------------------------------------------------|
| Risperidona<br>Sertralina (ISRS)<br>Sulpirida<br>Tiaprida       |
| ISRS: inhibidores selectivos de la recaptación de la serotonina |

Con la guanfacina tanto en monoterapia como en combinación con psicoestimulantes se han publicado cambios menores en los parámetros electrocardiográficos sin relevancia clínica como  $QRS > 120\text{ms}$ , aumento  $QTc > 60\text{ms}$  con respecto al basal o  $QTc$  estimado por la fórmula de Fridericia  $> 500\text{ms}^{25}$ .

## **7. RIESGO DE MUERTE SÚBITA Y EFECTOS ADVERSOS CARDIOVASCULARES GRAVES DE LOS FÁRMACOS UTILIZADOS EN EL TDAH**

### **7.1 En niños y adolescentes sin enfermedad cardíaca**

En la actualidad, no hay ningún estudio consistente que demuestre un aumento de la incidencia de efectos adversos cardiovasculares graves o aumento del riesgo de muerte súbita en niños y adolescentes sin enfermedad cardíaca tratados con fármacos para el TDAH.

Se han publicado casos aislados de efectos adversos graves con estos fármacos. Un paciente de 11 años presentó una parada cardíaca secundaria a fibrilación ventricular recuperada y en el que durante el ingreso se detectó un infarto de miocardio previo<sup>27</sup> y dos casos de miocardiopatía dilatada en pacientes jóvenes, 17 y 18 años, en Noruega<sup>28,29</sup>, todos ellos tratados con fármacos estimulantes. No obstante, estos pacientes presentaban, previamente al tratamiento, factores de riesgo cardiovascular, por lo que es difícil clarificar si los fármacos pudieron ser los causantes de alguna de las patologías.

Múltiples estudios han concluido que el tratamiento para TDAH no está asociado a efectos adversos cardiovasculares graves o muerte súbita<sup>30,31,62</sup>; sólo un estudio<sup>32</sup> mostró asociación entre la medicación utilizada para TDAH en la infancia y efectos adversos graves a nivel cardiovascular. Sin embargo, este estudio ha sido cuestionado ampliamente porque se trataba de casos de muerte súbita, infarto de miocardio o accidentes cerebro-vasculares que no podían atribuirse al uso de estimulantes como causa principal, presentando importantes errores metodológicos.

Un estudio prospectivo longitudinal<sup>33</sup> con una cohorte de 714. 259 pacientes, mostró un riesgo aumentado de efectos cardiovasculares que incluían HTA, fiebre reumática o “enfermedad cardiovascular” no definiendo claramente esta última, por lo que es difícil obtener conclusiones sólidas.

Tampoco se encontró ninguna relación entre estos tratamientos con un aumento de muerte súbita en tres estudios retrospectivos<sup>34,35,36</sup> que incluyeron más de 1.8 millones de pacientes tratados con metilfenidato, derivados anfetamínicos y atomoxetina.

Por lo tanto, a pesar de la controversia, con la bibliografía existente, la evidencia sugiere que el riesgo de efectos cardiovasculares graves o riesgo de muerte súbita asociado a los fármacos estimulantes, atomoxetina o guanfacina en niños y adolescentes sin enfermedad cardíaca es extremadamente bajo siendo el beneficio del tratamiento mayor que los riesgos.

### **7.2 En niños y adolescentes con enfermedad cardíaca**

El riesgo de sufrir complicaciones cardiovasculares graves o riesgo de muerte súbita debido al tratamiento farmacológico para el TDAH no está claramente definido debido

a la falta de estudios consistentes, no habiendo ningún estudio que demuestre un aumento de estos riesgos en estos pacientes.

En relación con la percepción de este riesgo por parte de los médicos, en 2011 se publicó una encuesta realizada a electrofisiólogos y cardiólogos pediátricos<sup>37</sup> en la que se les presentaba 6 escenarios de pacientes con diagnóstico claro de TDAH y enfermedades cardíacas asociadas. La mayoría de los especialistas apoyaron el uso de estimulantes como tratamiento de primera línea o como segunda opción en caso de no ser suficiente la terapia no estimulante y en ningún caso se contraindicó su uso.

La mayoría de las guías actuales<sup>38,18,39</sup> recomiendan una valoración individual por un cardiólogo pediátrico antes y durante el tratamiento, sin poner restricciones al tratamiento en caso de cardiopatías congénitas (CC) hemodinámicamente estables.

En los pacientes que presentan una CC compleja o con sustratos arrítmicos que predisponen a muerte súbita, debe valorarse de forma individualizada el beneficio de los fármacos estimulantes con el eventual riesgo de sus efectos adversos<sup>40</sup>.

Se recomienda dejar como segunda línea de tratamiento estos fármacos en caso de CC inestable o que potencialmente pueda provocar arritmias graves, sin contraindicar su uso en caso necesario, incluso como tratamiento coadyuvante. Se recomienda consenso entre la familia, el cardiólogo pediátrico y el especialista en TDAH previo al inicio del tratamiento<sup>41,42</sup>.

En cuanto a las miocardiopatías, no hay publicaciones con recomendaciones para el tratamiento del TDAH en estos pacientes ni existen trabajos en la literatura que los relacionen con efectos adversos graves o muerte súbita. Hay un estudio de doce pacientes con miocardiopatías asociadas a síndromes genéticos<sup>34</sup>, en el que no se encuentra un aumento de complicaciones derivadas del tratamiento.

En relación a las canalopatías, en la literatura observamos una preocupación especial en aquellos pacientes que tienen un síndrome de QT largo congénito y en los trabajos publicados se insiste en la necesidad de la valoración por un cardiólogo pediátrico experto previo al inicio del tratamiento y durante el mismo. Una revisión sistemática<sup>43</sup> ha mostrado que estos fármacos tienen una afectación tan poco significativa sobre el intervalo QT, que concluyen que el beneficio de la terapia farmacológica es superior a los riesgos, siempre evaluando al paciente de forma individual. La única relación demostrada con un aumento del QT es la relacionada con una sobreingesta de atomoxetina<sup>23</sup> en pacientes metabolizadores lentos.

## 8. RECOMENDACIONES DE LOS ORGANISMOS REGULADORES Y ASESORES

**8.1 *Attention deficit hyperactivity disorder: diagnosis and management National Institute for Health and Care Excellence (NICE) guideline*<sup>44</sup> (2018).** La Guía recomienda, antes de comenzar el tratamiento, realizar una evaluación clínica que incluya una historia clínica buscando circunstancias que pueden suponer una contraindicación para medicamentos específicos, tratamiento actual, determinación de talla y peso con percentiles, medición de la frecuencia cardíaca y tensión arterial con manguito del tamaño adecuado y estimación de percentiles, una evaluación cardiovascular y un electrocardiograma (ECG) solo si recibe un tratamiento adicional que puede afectar el intervalo QT, por ejemplo antidepresivos tricíclicos.

Según la Guía NICE se debe remitir al cardiólogo antes de comenzar el tratamiento si están presentes cualquiera de las siguientes circunstancias: historia de CC o cirugía cardíaca previa, historia de muerte súbita en un familiar de primer grado menor de 40 años que sugiera cardiopatía, intolerancia al ejercicio en comparación con los compañeros, síncope con esfuerzo o coincidente con sustos o estímulos auditivos, palpitaciones rápidas, regulares, con inicio y fin brusco, las palpitaciones ocasionales suelen ser extrasístoles y no precisarían estudio, dolor torácico que sugiera origen cardíaco, signos de insuficiencia cardíaca, soplos cardíacos detectados en la exploración o cifras de hipertensión arterial. Se debe remitir a un especialista en hipertensión pediátrica antes de empezar el tratamiento si la tensión arterial está por encima del percentil 95 para la edad y talla de forma persistente

En cuanto al seguimiento cardiovascular del tratamiento, la Guía NICE recomienda medir la frecuencia cardíaca y la tensión arterial comparándola con el rango normal para la edad antes y después de los cambios de dosis y cada 6 meses. No se debe realizar ECG a los pacientes que toman medicamentos para el TDAH a menos que haya una indicación clínica. Si durante el tratamiento para el TDAH aparece taquicardia en reposo (más de 120 latidos por minuto), arritmia o tensión arterial sistólica por encima del percentil 95, o un aumento clínicamente significativo, en 2 ocasiones, se debe disminuir la dosis y referir a un especialista. Si durante el tratamiento con guanfacina aparece hipotensión ortostática mantenida o episodios sincopales, se debe reducir la dosis o cambiar a otro medicamento para el TDAH.

**8.2 *Canadian attention deficit hyperactivity disorder Resource Alliance (CADDRA): Canadian attention deficit hyperactivity disorder Practice Guidelines*<sup>39</sup> (2018).** La Guía Canadiense recomienda realizar una historia médica detallada para identificar los posibles riesgos cardiovasculares y remitir a la consulta de cardiología antes del tratamiento en caso de historia de presíncope no filiado, disnea, otros posibles síntomas cardíacos, cardiopatía conocida o historia familiar compatible con MSC. Advierte la Guía que los medicamentos para el TDAH pueden afectar la presión arterial y la frecuencia cardíaca recomendando su determinación antes del inicio de la



medicación y durante el seguimiento midiendo las constantes cuando la medicación este activa y comparando con las condiciones basales.

No se recomienda la realización de un ECG antes ni durante la administración del fármaco, en pacientes jóvenes sin antecedentes de enfermedad cardiovascular y examen físico normal.

Dentro del apartado de precauciones y contraindicaciones figura como contraindicación de los psicoestimulantes la hipertensión arterial moderada-grave y la enfermedad cardiovascular sintomática. Entre las contraindicaciones de la atomoxetina figuran la hipertensión arterial moderada-grave y la enfermedad cardiovascular sintomática, las enfermedades cardiovasculares graves y la arterioesclerosis avanzada.

Durante el tratamiento con guanfacina hay que controlar la tensión arterial y la frecuencia cardiaca por el riesgo de hipotensión, bradicardia y síncope, se debe considerar también el efecto rebote con hipertensión y aumento de frecuencia cardiaca en caso de retirada brusca del tratamiento. Asimismo, indican la monitorización del intervalo QTc en caso de que el paciente presentar enfermedades o esté recibiendo medicación que aumente el riesgo de prolongación del intervalo QTc.

De la misma manera, en los pacientes que reciben atomoxetina junto con fármacos que prolonguen el intervalo QTc éste debe ser monitorizado de forma estrecha.

**8.3 Evidence-based guidelines for the pharmacological management of attention deficit hyperactivity disorder: Update on recommendations from the British Association for Psychopharmacology<sup>45</sup>** (2014). La Asociación Británica de Psicofarmacología en sus recomendaciones publicadas en 2014 recomienda que antes de comenzar el tratamiento con medicamentos psicoestimulantes o atomoxetina, se realice historia clínica completa con examen físico básico que incluya altura, peso, frecuencia cardiaca, presión arterial y auscultación cardiopulmonar. Si hay antecedentes familiares o personales de enfermedad cardíaca o el examen cardiovascular es anormal, se recomienda realizar un ECG.

**8.4 Cardiovascular considerations of attention deficit hyperactivity disorder medications: a report of the European Network on Hyperactivity Disorders work group, European Attention Deficit Hyperactivity Disorder Guidelines Group on attention deficit hyperactivity disorder drug safety meeting<sup>14</sup>** (2012). La Guía del Grupo Europeo de déficit de atención e hiperactividad, publicada en 2012, recomienda antes de iniciar el tratamiento realizar una evaluación clínica por el especialista en TDAH que incluya la identificación de cualquier enfermedad cardíaca previa conocida, historia de síncope con ejercicio, historia familiar de muerte súbita en menores de 40 años, frecuencia cardíaca y tensión arterial basal, que se debe repetir dos veces si la lectura inicial es de hipertensión, y auscultación cardíaca para descartar la presencia

de soplos, más allá de un soplo funcional ya conocido. Se recomienda utilizar las normas de la Sociedad Europea de Hipertensión para la medición de la tensión arterial utilizando un tamaño de manguito adecuado para la edad del paciente y establecer los percentiles ajustados con la talla<sup>46</sup>.

En caso de aparecer sintomatología como palpitaciones, los pacientes se deben manejar como los pacientes que no reciben medicamentos. Las extrasístoles ocasionales o las rachas cortas de taquicardia supraventricular no sostenida probablemente carecen de importancia mientras que una taquicardia sintomática más persistente o una taquicardia ventricular documentada, con o sin relación con el ejercicio, puede ser una arritmia más importante estando en estos casos justificada la remisión al especialista. Esta Guía refiere que no hay evidencia que sugiera un beneficio en la realización de un ECG en la población general pediátrica previo a la medicación.

El especialista en TDAH es, según esta Guía, la persona adecuada para evaluar los riesgos y beneficios y hacer recomendaciones de tratamiento farmacológico en los pacientes sin enfermedad cardíaca conocida. En caso de enfermedad cardíaca conocida seguida por un cardiólogo, el especialista en TDAH sigue siendo la persona adecuada para evaluar el beneficio y el riesgo y hacer las recomendaciones sobre medicación. A pesar de que no haya evidencia de que la medicación aumente el riesgo de muerte súbita, incluso si ya está de por sí elevada, la Guía recomienda la remisión y evaluación por el cardiólogo.

Para los pacientes con TDAH con sospecha de enfermedad cardíaca o factores de riesgo de muerte súbita, la Guía recomienda la evaluación por parte de un cardiólogo, de la misma manera que se haría con un paciente sin TDAH.

La identificación de factores de riesgo de muerte súbita no debe excluir automáticamente el uso de medicamentos para el TDAH según esta Guía. En estos casos, por ejemplo, en el síndrome de QT largo congénito, una discusión de estos aspectos entre la familia, el especialista en TDAH y el cardiólogo o electrofisiólogo pediátrico debería ayudar a clarificar la aceptabilidad del tratamiento para un paciente concreto.

**8.5 European guidelines on managing adverse effects of medication for ADHD**  
**European Network for Hyperkinetic Disorders (EUNETHYDIS)<sup>18</sup>** (2010). Esta Guía de la Red europea de trastornos hiperquinéticos del año 2010 considera que, para los pacientes con TDAH sin enfermedad cardíaca conocida, el especialista en TDAH, ya sea psiquiatra o pediatra, es la persona adecuada para la evaluación de los beneficios y riesgos, y para la elaboración de recomendaciones del tratamiento. En caso de enfermedad cardíaca conocida, la Guía considera útil la valoración por un cardiólogo o electrofisiólogo pediátrico aunque el especialista en TDAH sigue siendo la persona

adecuada para evaluar el beneficio y el riesgo y hacer las recomendaciones sobre medicación. En los casos con riesgo de muerte súbita, por ejemplo en el síndrome de QT largo congénito, una discusión de estos aspectos entre la familia, el especialista en TDAH y el cardiólogo o electrofisiólogo pediátrico debería ayudar a clarificar la aceptabilidad del tratamiento para un paciente concreto.

La Guía recomienda el control previo al inicio de cualquier medicamento para el TDAH de la frecuencia cardíaca y la presión arterial en todos los pacientes, con monitorización posterior cada tres o seis meses con variaciones individuales.

La tensión arterial elevada de forma mantenida antes o durante el tratamiento con estimulantes requiere evaluación y tratamiento. La presión arterial se debe medir antes de iniciar el tratamiento y en cada visita comparando los percentiles con tablas adecuadas. Si la primera medición esta elevada, debe repetirse al menos dos veces y si se mantiene elevada, y por encima del percentil 95, se debe derivar el paciente a un especialista en hipertensión pediátrica, para realización de Holter de TA de 24 horas, confirmación del diagnóstico y descartar daño orgánico. En pacientes ya tratados para el TDAH, alternativamente, se podría proponer una reducción de la dosis o una interrupción temporal del tratamiento antes de referir al especialista, esto último principalmente para confirmar el papel potencialmente hipertensor del fármaco. El manejo posterior dependerá de la gravedad de la elevación de la tensión arterial y, de acuerdo con el especialista en TDAH, puede consistir en un tratamiento antihipertensivo además de los estimulantes o la suspensión del medicamento.

Los pacientes con frecuencia cardíaca por encima de 120lpm de forma mantenida deben ser remitidos para revisión cardiológica. Las palpitaciones de nueva aparición deben manejarse como en los pacientes sin medicación; los latidos adicionales ocasionales no son necesariamente preocupantes pero una taquicardia persistente podría deberse a una arritmia y debe investigarse. En relación a la realización de un ECG de rutina en los pacientes antes del inicio de la medicación esta Guía europea definía que no hay evidencia que sugiera un beneficio para la realización del mismo.

**8.6 Guía de Práctica Clínica sobre el Trastorno por Déficit de Atención con Hiperactividad (TDAH) en Niños y Adolescentes. Ministerio de Sanidad, Política Social e Igualdad<sup>47</sup> (2010).** Esta Guía recomienda realizar, antes de iniciar el tratamiento farmacológico, un examen físico que incluya medición de la presión arterial, frecuencia cardíaca, peso y talla. Se deben buscar antecedentes personales y familiares de enfermedad cardiovascular, de historia de síncope relacionado con el ejercicio, u otros síntomas cardiovasculares. También recomienda realizar un estudio cardiovascular previo al inicio del tratamiento farmacológico si existe historia personal y/o familiar de enfermedad cardiovascular o antecedentes cardiovasculares graves o antecedentes de muerte súbita en la familia o hallazgo anormal en la exploración física inicial clínica.

Recomienda también el control de la TA, frecuencia cardíaca, peso y talla cada 3 meses.

**8.7 Cardiovascular Monitoring of Children and Adolescents With Heart Disease Receiving Medications for Attention Deficit/Hyperactivity Disorder A Scientific Statement From the American Heart Association Council on Cardiovascular Disease in the Young Congenital Cardiac Defects Committee and the Council on Cardiovascular Nursing<sup>42</sup> (2008).** Esta Guía recomienda, antes de iniciar el tratamiento con psicoestimulantes realizar una evaluación con especial atención a los síntomas que pueden indicar una afección cardíaca como palpitaciones, síncope o presíncope. Se deben identificar otros medicamentos que utilice el paciente incluidos los fármacos sin receta, y recoger los antecedentes familiares, especialmente relativos a afecciones asociadas con MSC, miocardiopatía hipertrófica (MH), síndrome de QT largo (SQTL), de QT corto, de Brugada, de Wolf Parkinson White (WPW) o de Marfan. En caso de detectar cualquiera de estos síntomas o presentar antecedentes familiares debe remitirse el paciente al cardiólogo pediátrico antes de iniciar el tratamiento. El examen físico debe dirigirse a descartar hipertensión, soplos cardíacos, hallazgos físicos asociados con el síndrome de Marfan o arritmias. Algunas de las cardiopatías relacionadas con la MSC no se pueden detectar con un examen físico. Por lo tanto, puede ser de utilidad realizar un ECG que para aumentar la probabilidad de identificar cardiopatías importantes como la MH, el SQTL o el síndrome de WPW entidades todas relacionadas con la MSC.

No obstante, el ECG no identificará a todos los individuos con las cardiopatías anteriores. Por tanto, el ECG puede ser útil y aumentar la sensibilidad de la evaluación, solo si hay sospechas de cardiopatías de alto riesgo. Esta Guía considera razonable obtener ECG como parte de la evaluación de los niños que van a recibir tratamiento con fármacos estimulantes. Sin embargo, no existe ninguna evidencia de que el riesgo de MSC sea mayor en los pacientes que reciben estimulantes que en la población general, ni tampoco de que la realización del ECG rutinario previo al tratamiento pueda disminuir el riesgo de MSC. Se debe remitir al cardiólogo pediátrico antes de iniciar el tratamiento los pacientes con algún hallazgo significativo en el ECG.

En relación al seguimiento cardiovascular de pacientes con cardiopatía estructural u otras afecciones cardíacas conocidas esta guía presenta cinco recomendaciones.

1. Aunque existen advertencias en las fichas técnicas de estos medicamentos con respecto a todos los pacientes con cardiopatía estructural, no hay estudios clínicos que indiquen que los niños con la mayor parte de las cardiopatías congénitas tengan un riesgo significativo de MSC cuando reciben estos medicamentos. Es razonable considerar el uso de medicamentos estimulantes en pacientes con cardiopatía congénita no intervenida o intervenida pero sin repercusión hemodinámica ni

arritmias o cardiopatías congénitas que el cardiólogo pediátrico del paciente considera estable y sin riesgo específico.

2. Es razonable usar estimulantes con precaución, después de que se hayan considerado o utilizado otros métodos de tratamiento para el TDAH, en los siguientes grupos de pacientes; 1. Cardiopatías asociadas con MSC (SQTL, síndrome de QT corto, MH, displasia arritmogénica del ventrículo derecho, síndrome de Brugada, anomalías coronarias, WPW, síndrome de Marfan), 2. Antecedentes de arritmia que haya requerido reanimación cardiopulmonar, cardioversión, desfibrilación o sobreestimulación, 3. Antecedentes arritmia asociada con MSC, 4. MSC previa abortada, 5. Otras arritmias clínicamente significativas no tratadas o no controladas, 6. Intervalo QTc >0.46 seg, 7. Frecuencia cardíaca o tensión arterial 2 DS por encima de la media.

3. Se debe realizar un seguimiento cuidadoso después de iniciar medicamentos estimulantes en los pacientes señalados en la recomendación anterior.

4. Si alguna de las afecciones o arritmias anteriores se diagnostica durante el tratamiento, se debe considerar la interrupción de la medicación estimulante hasta que se puedan realizar más pruebas e iniciar tratamiento.

5. Si las arritmias se tratan y controlan, con la aprobación de un cardiólogo pediátrico, se puede reiniciar el tratamiento.

## 9. RECOMENDACIONES DE LA AGENCIA ESPAÑOLA DEL MEDICAMENTO EN LAS FICHAS TÉCNICAS

La AEMPS recoge en las fichas técnicas de los medicamentos aprobados para el tratamiento del TDAH (Metilfenidato, Lisdexanfetamina, Atomoxetina y Guanfacina) una serie de recomendaciones, advertencias y precauciones de estos fármacos<sup>48,49,50,51</sup>.

**9.1 *Fármacos psicoestimulantes metilfenidato*** (Rubifén®, Medicebrán®, Medikinet®, Equasym®, Concerta®, Rubicrono®) **y *lisdexanfetamina*** (Elvanse®) **y *no estimulantes atomoxetina*** (Strattera®).

Las fichas técnicas de estos medicamentos recomiendan realizar una historia clínica detallada que incluya antecedentes personales y familiares de interés (antecedentes de MSC/ inexplicada o arritmia maligna) y un examen físico completo (incluyendo tensión arterial y frecuencia cardíaca), con la finalidad de descartar patología cardíaca. En caso de presentar algún hallazgo, se aconseja la valoración por un cardiólogo pediátrico antes de iniciar tratamiento.

La frecuencia cardíaca y la tensión arterial deben ser medidas y registradas durante el tratamiento, con cada ajuste de dosis y después al menos cada 6 meses para detectar posibles aumentos clínicamente importantes. Dichos parámetros se ajustaran por percentiles.

La aparición de síntomas como palpitaciones, dolor torácico de esfuerzo, síncope sin explicación, disnea u otros durante el tratamiento, que sugieran una enfermedad cardíaca, deben ser evaluados por un cardiólogo. Con el uso de Atomoxetina se han documentado casos de hipotensión ortoestática y síncope.

En cuanto las precauciones y contraindicaciones para ambos grupos se han notificado casos de muerte súbita en niños y adolescentes asociada al uso de estos medicamentos, en pacientes que padecían anomalías cardíacas estructurales y otros problemas cardíacos graves.

La utilización de psicoestimulantes del sistema nervioso central (metilfenidato y lisdexanfetamina) y/o atomoxetina está contraindicada, a menos que se disponga de una recomendación de un especialista cardiólogo pediátrico, en pacientes con trastornos cardiovasculares graves: hipertensión grave, insuficiencia cardíaca, enfermedad arterial oclusiva, angina, enfermedad cardíaca congénita hemodinámicamente significativa, cardiomiopatías, infarto de miocardio, arritmias potencialmente mortales y canalopatías (trastornos provocados por la disfunción de los canales iónicos).

La atomoxetina debe usarse con precaución en pacientes con SQTl congénito o adquirido o pacientes con antecedentes familiares de SQTl.

En cuanto a las interacciones farmacológicas se resalta que estos medicamentos pueden disminuir la eficacia de los fármacos antihipertensivos y que hay que tener precaución si se administran junto con fármacos que también aumenten las cifras de tensión arterial.

De forma particular la Atomoxetina se metaboliza a través de la enzima CYP2D6, por tanto, los pacientes metabolizadores lentos (un 7% de la raza caucásica tiene un genotipo con la enzima CYP2D6 no funcional) tienen un mayor riesgo de reacciones adversas.

### 9.2 **Fármacos $\alpha$ -agonistas; Guanfacina** (Intuniv®)

La ficha técnica advierte que la guanfacina puede producir bradicardia, hipotensión y síncope. Antes de iniciar el tratamiento se debe evaluar el estado cardiovascular del paciente, incluidos los parámetros de la frecuencia cardíaca y la tensión arterial, exploración física completa y los antecedentes familiares de MSC/muerte súbita inexplicada, para identificar a los pacientes con mayor riesgo de hipotensión, bradicardia y prolongación del intervalo QTc/riesgo de arritmia.

El seguimiento posterior con control de la frecuencia cardíaca y la tensión arterial se debe realizar de forma semanal durante el ajuste y la estabilización de la dosis y al menos cada 3 meses durante el primer año, siguiendo el criterio clínico. A partir de entonces, cada 6 meses, con un control más frecuente tras cada ajuste de la dosis. La tensión arterial y la frecuencia cardíaca pueden aumentar tras la interrupción de Guanfacina, la dosis se debe modificar de forma gradual, para minimizar dichos efectos.

Asimismo se recomienda tener precaución al tratar a:

- Pacientes que reciben tratamiento concomitante con antihipertensivos u otros medicamentos que puedan reducir la tensión arterial, la frecuencia cardíaca o aumentar el riesgo de síncope.
- Pacientes con antecedentes de prolongación del intervalo QT, factores de riesgo de taquicardia ventricular (torsade de pointes) o en pacientes que tomen medicamentos que prologan el intervalo QT.
- Pacientes a los que se le administra junto con otros fármacos inhibidores/inductores de CYP3A4 y CYP3A5, ya que es un fármaco que se metaboliza vía CYP3A4/5. Las concentraciones plasmáticas de guanfacina pueden verse aumentadas o reducidas, pudiendo afectar a su eficacia y seguridad.

En la Tabla 2 se muestran las reacciones cardiovasculares adversas observadas publicadas en las fichas técnicas.

| <b>Tabla 2 Reacciones cardiovasculares adversas observadas publicadas en las fichas técnicas</b> <sup>48,49,50,51</sup> |                                                                    |                                                                                                         |                                                                       |                                                                              |
|-------------------------------------------------------------------------------------------------------------------------|--------------------------------------------------------------------|---------------------------------------------------------------------------------------------------------|-----------------------------------------------------------------------|------------------------------------------------------------------------------|
|                                                                                                                         | Metilfenidato                                                      | Lisdexanfetamina                                                                                        | Atomoxetina                                                           | Guanfacina                                                                   |
| Muy frecuentes (≥1/10)                                                                                                  |                                                                    |                                                                                                         | Aumento de la frecuencia cardíaca y tensión arterial                  |                                                                              |
| Frecuentes (≥1/100 a <1/10)                                                                                             | Arritmia<br>Taquicardia<br>Palpitaciones<br>Hipertensión arterial. | Taquicardia (6-17 años)<br>Palpitaciones (13-17 años)                                                   |                                                                       | Bradicardia<br>Disminución de la tensión arterial<br>Hipotensión ortostática |
| Poco frecuentes (≥1/1000 a <1/100)                                                                                      | Dolor de pecho                                                     | Palpitaciones (6-12 años),<br>Cardiomiopatía (13-17 años)<br>Aumento de la tensión arterial (6-17 años) | Palpitaciones<br>Taquicardia sinusal<br>Prolongación del intervalo QT | Bloqueo AV de primer grado<br>Taquicardia<br>Arritmia sinusal<br>Síncope     |
| Raras (≥1/10.000 a <1/1.000)                                                                                            | Angina de pecho                                                    |                                                                                                         |                                                                       | Hipertensión                                                                 |
| Muy raras (<1/10.000)                                                                                                   | Parada cardíaca<br>Infarto de miocardio                            |                                                                                                         |                                                                       |                                                                              |
| No conocida                                                                                                             | Taquicardia supraventricular<br>Bradicardia<br>Extrasístoles       | Cardiomiopatía (6-12 años)                                                                              |                                                                       |                                                                              |

Todos estos fármacos tienen materiales informativos que proporcionan herramientas en forma de *checklist* para ayudar al médico a identificar, antes del inicio del tratamiento, a aquellos pacientes que no pueden recibir tratamiento con el fármaco o aquellos en los que será necesario extremar la precaución y, durante el tratamiento, a realizar un adecuado seguimiento de los pacientes.

Toda la información referente al metilfenidato se encuentra publicada en la siguiente dirección web desde dónde se podrán descargar los documentos correspondientes: <http://www.methylphenidate-guide.eu/landing/>.

Para el resto de los fármacos se encuentra publicada en el buscador de medicamentos CIMA de la Agencia Española de Medicamentos y Productos Sanitarios y que viene identificado con el símbolo “i” situado al lado del medicamento correspondiente.



## 10. RECOMENDACIONES DE LA SECPCC SOBRE LA EVALUACIÓN CARDIOVASCULAR PREVIA AL TRATAMIENTO

### 10.1 En niños y adolescentes sin enfermedad cardiovascular conocida

En base a la bibliografía<sup>52</sup> disponible en la actualidad y en consonancia con las principales guías internacionales<sup>42,18,39,44,19,53</sup> la SECPCC recomienda realizar una evaluación cardiovascular previa al tratamiento de TDAH en niños y adolescentes sin enfermedad cardiovascular conocida, mediante anamnesis y exploración física. El ECG no se recomienda de rutina, solo en casos seleccionados, tal y como se describe a continuación.

**10.1.1. Anamnesis:** se incidirá en la identificación de cardiopatía conocida y en la presencia de síntomas de alarma como síncope sugestivo de origen cardiovascular (tabla 3) o de perfil no vasovagal, precordialgia sugestiva de origen cardiovascular, palpitaciones o disnea con ejercicio. También se debe indagar acerca de casos familiares de muerte súbita en menores de 40 años, o familiares afectados de cardiopatías como miocardiopatía hipertrófica, SQTL u otra canalopatía, preexcitación tipo Wolff-Parkinson-White, válvula aortica bicúspide, coartación de aorta, HTA en edad temprana o nefropatía. Ante la detección de signos de alarma o indicio razonable de cardiopatía, se remitirá al paciente al especialista en cardiología antes de iniciar el tratamiento farmacológico.

**Tabla 3. Síncope sugestivo de origen cardiovascular**

|                                                                    |
|--------------------------------------------------------------------|
| Presencia de cardiopatía estructural                               |
| Historia familiar de MSC                                           |
| Durante el esfuerzo, con emociones o en posición supina            |
| Inicio súbito de palpitaciones o dolor torácico seguido de síncope |
| Presencia de soplo orgánico                                        |
| ECG anormal                                                        |
| MSC: muerte súbita cardíaca                                        |

**10.1.2. Exploración física:** se debe medir y pesar al paciente. Se prestará especial atención en la auscultación cardíaca para la detección de soplos, así como en la identificación de estigmas de síndrome de Marfan como talla alta para la talla familiar, fenotipo leptosomático, pectus carinatum/excavatum, facies alargada, dedos largos y finos, extensión reducida del codo o escoliosis entre otros. Si se detecta soplo cardíaco o estigmas de la citada enfermedad, debe remitirse al paciente al especialista en cardiología antes de iniciar el tratamiento farmacológico. Puesto que diversos estudios<sup>11</sup> han demostrado leves aumentos en la frecuencia cardíaca y en la tensión arterial tanto sistólica como diastólica en relación con la toma de fármacos estimulantes y no estimulantes en el tratamiento del TDAH, se recomienda incluir en la

evaluación previa al inicio de la terapia, la medición de frecuencia cardíaca y de tensión arterial con controles posteriores cada 3-6 meses.

**10.1.3. Tensión arterial:** se recomienda utilizar las normas de la Sociedad Europea de Hipertensión<sup>54</sup> para la medición de la presión arterial utilizando un tamaño de manguito adecuado a la edad del paciente y establecer los percentiles de presión arterial ajustados con la altura. Si la primera determinación de la tensión arterial es elevada, se debe repetir al menos en 2 ocasiones. Si aún permanece elevada (por encima del percentil 95) debe completarse estudio de hipertensión arterial mediante monitorización ambulatoria de TA (MAPA) y si se confirma la misma, realizar el estudio etiológico y de daños en órganos diana. En pacientes que ya estuviesen recibiendo tratamiento farmacológico para TDAH y se constata tensión arterial elevada, se podría reducir la dosis o retirar la medicación antes de iniciar el estudio de hipertensión. Una vez que se haya establecido el diagnóstico, el manejo puede realizarse combinando fármacos antihipertensivos con fármacos para el TDAH, optando por Guanfacina, que se asocia a hipotensión, reduciendo la dosis o, por último, suspendiendo el tratamiento.

**10.1.4. Frecuencia cardíaca:** si se constata una frecuencia cardíaca por encima del p99 (Tabla 4), de forma mantenida, deben estudiarse causas psicológicas y médicas, y se realizará un ECG para confirmar que se trata de una taquicardia sinusal y no de otra arritmia. Hay que tener en cuenta que los pacientes con TDAH con frecuencia presentan síntomas de ansiedad asociados, que pueden conllevar un aumento de la frecuencia cardíaca. Es posible pero muy infrecuente que la taquicardia sinusal pueda ser lo suficientemente sintomática como para requerir un ajuste o interrupción del tratamiento farmacológico.

**10.1.5. Electrocardiograma:** no se recomienda la realización rutinaria de un ECG como parte de la valoración cardiovascular previa al inicio del tratamiento. En los casos de tratamiento con Guanfacina y Atomoxetina, en combinación con otros medicamentos que puedan prolongar el intervalo QT (escitalopram, fluoxetina), o en tratamientos que combinen metilfenidato con risperidona<sup>55</sup>, conviene monitorizar el intervalo QTc. Se realizará ECG en caso de remitir al cardiólogo por hallazgos anómalos en la exploración cardiológica, presencia de síntomas sugestivos de origen cardiovascular o historia familiar muerte súbita.

## **10.2 En niños y adolescentes con enfermedad cardiovascular conocida**

Si el paciente tiene una enfermedad cardíaca conocida se recomienda consulta con el cardiólogo pediátrico antes de iniciar el tratamiento.

La medicación más adecuada se debe discutir con el cardiólogo y el especialista en TDAH y tomar una decisión conjunta con la familia después de una información adecuada sopesando los riesgos y los beneficios del tratamiento.

Se recomienda la medición de TA y frecuencia cardiaca antes de iniciar el tratamiento y controles cada 3-6 meses (Tabla 4). En los pacientes con cardiopatías congénitas y una fisiología circulatoria que pueda verse comprometida por taquicardia o aumento de TA, la monitorización de la TA y la frecuencia cardiaca debe ser cada 1 ó 2 meses. Si se detecta taquicardia persistente o historia sugestiva de arritmia, debe realizarse un holter ECG de 24 h. (Tabla 5).

| <b>Tabla 4 Frecuencia cardiaca (lpm) por grupos de edad y percentil*</b>                                                                                                                                                |           |                |            |
|-------------------------------------------------------------------------------------------------------------------------------------------------------------------------------------------------------------------------|-----------|----------------|------------|
|                                                                                                                                                                                                                         | <b>p1</b> | <b>p10-p90</b> | <b>p99</b> |
| 4 - <6 años                                                                                                                                                                                                             | 65        | 81-117         | 131        |
| 6 - <8 años                                                                                                                                                                                                             | 59        | 74-111         | 123        |
| 8 - <12 años                                                                                                                                                                                                            | 52        | 67-103         | 115        |
| 12 - <15 años                                                                                                                                                                                                           | 47        | 62-96          | 108        |
| 15 - 18 años                                                                                                                                                                                                            | 43        | 58-92          | 104        |
| Modificado de Fleming S, Thompson M, Stevens R, et al. Normal ranges of heart rate and respiratory rate in children from birth to 18 years of age: A systematic review of observational studies. Lancet 2011; 377:1011. |           |                |            |

| <b>Tala 5 Valores de frecuencia cardiaca media (lpm) y desviación estándar de Holter ECG 24 horas*</b>                                                                                                                 |                |                |
|------------------------------------------------------------------------------------------------------------------------------------------------------------------------------------------------------------------------|----------------|----------------|
| <b>Edad (años)</b>                                                                                                                                                                                                     | <b>Varones</b> | <b>Mujeres</b> |
| 5 - <8                                                                                                                                                                                                                 | 87 ±11         | 92±8           |
| 8 - <12                                                                                                                                                                                                                | 83±9           | 85±8           |
| 12 - <16                                                                                                                                                                                                               | 82±7           | 84±8           |
| 16 - <18                                                                                                                                                                                                               | 77±7           | 80±2           |
| *Modificado de Krasemann T, Strompen C, Blumenberg J, Gehrmann J, Burkhardtmaier G, Vogt J. Changes of the corrected QT interval in healthyboys and girls over day and night. European Heart Journal (2009)30, 202–208 |                |                |

## **11. RECOMENDACIONES DE LA SECPCC SOBRE EL USO DE FÁRMACOS PARA EL TDAH EN NIÑOS Y ADOLESCENTES CON ENFERMEDAD CARDIOVASCULAR**

### **11.1 Pacientes con síntomas cardiológicos sin evidencia de cardiopatía**

- En niños y adolescentes con diagnóstico de síncope neurocardiogénico o sintomatología sugestiva de ortostatismo se puede iniciar tratamiento para el TDAH, evitando el uso de Guanfacina por su efecto hipotensor.
- En niños y adolescentes con diagnóstico de dolor torácico inespecífico o palpitaciones con estudio cardiológico normal (ECG, Ecocardiograma, Holter ECG y/o ergometría en su caso) se puede iniciar tratamiento para el TDAH tanto estimulante como no estimulante.
- En niños con antecedentes familiares de muerte súbita, sin evidencia de cardiopatía familiar, y estudio cardiológico normal (ECG, Ecocardiograma, Holter ECG y/o ergometría en su caso) y estudio genético negativo o no indicado, se puede iniciar tratamiento para el TDAH.
- En niños con antecedentes familiares de muerte súbita, estudio cardiológico normal (ECG, Ecocardiograma, Holter ECG y/o ergometría en su caso, y estudio genético positivo con fenotipo negativo en el momento de la evaluación, hay que individualizar cada caso.

### **11.2 Cardiopatías congénitas (CC)**

El riesgo de complicaciones cardiovasculares secundarias a tratamiento para TDAH en pacientes con CC conocida no está bien establecido por la escasez de estudios. Tan solo se registra en la literatura un estudio de 12 pacientes con síndrome de DiGeorge, donde no se relatan complicaciones derivadas del tratamiento para TDAH<sup>56</sup>.

Los efectos secundarios cardiovasculares de los fármacos para TDAH, son poco significativos desde el punto de vista hemodinámico (aumento de frecuencia cardiaca de 1-2 latidos por minuto, y de tensión arterial sistólica y diastólica de 3-4 mmHg) para la población general y para la mayoría de la población con CC estables. Sin embargo, estos cambios hemodinámicos pueden ser mayores por respuesta idiosincrásica, metabolizadores lentos, combinación de drogas, infección intercurrente, sobredosificación o intoxicación. En estos casos, un aumento notable de la frecuencia cardiaca o la tensión arterial podría comprometer la situación hemodinámica de pacientes con CC.

No se han documentado arritmias malignas en pacientes con CC que reciben tratamiento para el TDAH. El riesgo de muerte súbita dentro de las CC es mayor en determinadas anatomías como la estenosis aórtica, la corrección de intercambio auricular por transposición de grandes arterias (actualmente en desuso en población pediátrica en nuestro medio) y la tetralogía de Fallot. Este riesgo se incrementa con la edad, siendo la incidencia en niños muy baja. No hay estudios que cuantifiquen o

estratifiquen factores de riesgo de muerte súbita en pacientes con CC, ni que afirmen que la toma de medicamentos para el TDAH sea un factor de riesgo para muerte súbita.

Sin embargo, es razonable pensar que los niños con CC pudieran tener una mayor riesgo de arritmias por los fármacos con efecto simpaticomimético en un sustrato de por sí arritmogénico por hipertrofia miocárdica o cicatrices quirúrgicas. Esta hipótesis justifica la recomendación de que los pacientes con CC conocida, deben recibir asesoramiento individualizado por su cardiólogo pediátrico antes y durante el tratamiento con fármacos estimulantes valorando individualmente el riesgo/beneficio del tratamiento junto con el especialista en TDAH (neurólogo, psiquiatra o pediatra).

Las recomendaciones de la SECPCC en relación a pacientes con CC y fármacos para el TDAH son las siguientes:

1. Pueden recibir tratamiento con fármacos para el TDAH:

- Pacientes con cardiopatías congénitas leves, sin repercusión hemodinámica, no intervenidas y que no reciben tratamiento para su cardiopatía.
- Pacientes con cardiopatías congénitas simples y complejas intervenidas con buen resultado, sin lesiones residuales y que no reciben tratamiento para su cardiopatía.

2. Se debe individualizar la situación para valorar la recomendación de tratamiento farmacológico para el TDAH:

- Pacientes especialmente sensibles a un aumento de la postcarga por aumento de la tensión arterial secundaria a tratamiento estimulante como aquellos con insuficiencia de válvula ventrículo-arterial o atrio-ventricular sistémica.
- Pacientes especialmente sensibles a un descenso de la postcarga por potencial descenso de la tensión arterial secundaria a tratamiento con guanfacina como aquellos con obstrucción a la salida del ventrículo sistémico.
- Pacientes especialmente sensibles a una potencial taquicardización por fármacos estimulantes, como aquellos con disfunción diastólica o en la estenosis mitral en los que la diástole no debe acortarse, o aquellos con disfunción sistólica donde no es recomendable un aumento del consumo miocárdico de oxígeno por taquicardia.
- Pacientes con riesgo de disfunción coronaria: Kawasaki, reimplantación quirúrgica de arterias coronarias (*switch* arterial, cirugía de Ross, origen anómalo de la coronaria izquierda en la arteria pulmonar), trayectos y origen anómalo de coronarias, vasculitis, enfermedad ateromatosa coronaria precoz. En estos casos se debe tener en cuenta que la reserva de perfusión coronaria sea adecuada en caso de un potencial aumento de la demanda miocárdica de oxígeno, motivado por los fármacos simpaticomiméticos.
- Se recomienda en todos los casos la monitorización clínica del paciente una vez iniciado el tratamiento valorando la respuesta tensional, frecuencia cardíaca y

electrocardiográfica y el impacto de la modificación de estas variables en la hemodinámica del paciente debiéndose realizar al inicio del tratamiento y con los sucesivos incrementos de dosis si los hubiese. Se debe individualizar la frecuencia de la monitorización.

- Se debe considerar el ajuste de dosis o retirada de fármacos para TDAH en casos de respuesta hemodinámica adversa para la cardiopatía del paciente.

3) No se recomienda iniciar tratamiento:

- Pacientes con CC hemodinámicamente inestables debiéndose resolver o tratar antes las lesiones hemodinámica o clínicamente significativas.
- Pacientes con CC e HTA residual. Un adecuado manejo y control de la tensión arterial debe preceder a la instauración del tratamiento para TDAH.

### 11.3 Miocardiopatías

Las miocardiopatías son lesiones intrínsecas del miocardio de múltiples etiologías y con muy variado espectro clínico desde pacientes asintomáticos hasta candidatos a trasplante cardíaco y con un riesgo variable de muerte súbita arrítmica según el tipo de miocardiopatía. Algunas miocardiopatías asocian síndromes genéticos o polimalformativos con distintos grados de afectación neurológica, incluido el TDAH, por lo que estos pacientes tienen más probabilidad de beneficiarse de un tratamiento estimulante.

No existen en la literatura recomendaciones específicas para el tratamiento de TDAH de pacientes con miocardiopatía, así como tampoco hay publicados casos de muerte súbita por esta causa.

Fisiopatológicamente, los potenciales efectos secundarios de sustancias simpaticométicas, podrían tener las siguientes consecuencias:

- En la miocardiopatía dilatada, un aumento de la postcarga (HTA) o una taquicardización exagerada podría aumentar el consumo miocárdico de oxígeno, causar un desequilibrio oferta/demanda de oxígeno en miocardio y desencadenar isquemia con aparición de arritmias malignas o claudicación del ventrículo izquierdo.
- En la miocardiopatía hipertrófica, el aumento del inotropismo podría causar o aumentar una obstrucción dinámica en los tractos de salida ventriculares y el aumento de la frecuencia cardíaca podría desencadenar o agravar disfunción diastólica por acortamiento de la diástole. Al igual que en la miocardiopatía dilatada, un aumento del consumo de oxígeno, sin aumento adecuado del aporte de oxígeno coronario, puede ser causante de isquemia y arritmias malignas.
- En las miocardiopatías hipertróficas obstructivas, un descenso brusco de la tensión arterial como el que puede potencialmente ocasionar la guanfacina podría comprometer la presión de perfusión miocárdica ocasionado isquemia.

- En las miocardiopatías con tendencia a la inestabilidad eléctrica, el aumento de actividad simpaticomimética puede agravar el desequilibrio y desencadenar trastornos del ritmo graves.

La SECPCC propone las siguientes recomendaciones generales en casos de miocardiopatías:

- Se debe valorar individualmente el riesgo/beneficio del tratamiento del TDAH junto con el especialista en TDAH (neurólogo, psiquiatra o pediatra).
- No es recomendable iniciar tratamiento en pacientes con miocardiopatías hemodinámicamente inestables.
- Es recomendable la monitorización clínica del paciente una vez iniciado el tratamiento valorando la respuesta tensional, frecuencia cardíaca y electrocardiográfica y el impacto de la modificación de estas variables en la hemodinámica del paciente debiéndose realizar al inicio del tratamiento y con los sucesivos incrementos de dosis si los hubiese.
- Se debe considerar el ajuste de dosis o retirada de fármacos para TDAH en casos de respuesta hemodinámica adversa para la cardiopatía del paciente.

#### 11.4 Síndrome de Marfan y otras aortopatías

La primera causa de morbilidad y mortalidad del síndrome de Marfan es la dilatación progresiva de la raíz aórtica<sup>57</sup> siendo la prevención de la misma el objetivo principal del tratamiento. Es especialmente importante evitar el estrés sobre la raíz aórtica susceptible, debiéndose evitar el deporte de competición, de contacto, y los ejercicios isométricos así como la hipertensión arterial.

Los niños con síndrome de Marfan son más propensos que la población general a tener TDAH<sup>58</sup>. Los potenciales efectos adversos cardiovasculares de los fármacos para el TDAH descritos previamente, especialmente el aumento de la tensión arterial, teóricamente pueden conllevar un aumento del riesgo de dilatación y disección aórtica, aunque no existe evidencia suficiente en contra de la prescripción de fármacos para el TDAH<sup>13</sup>.

Los pacientes con síndrome de Marfan deben ser controlados en centros especializados y de forma multidisciplinar y cada caso debe evaluarse individualmente y en coordinación entre el especialista en TDAH (pediatra, neurólogo, psiquiatra) y el cardiólogo.

Las recomendaciones de la SECPCC son las siguientes:

- En los pacientes con dimensiones normales de la raíz aórtica, con o sin tratamiento de base, se puede iniciar tratamiento para el TDAH con controles de TA y frecuencia cardíaca cada uno o dos meses y siempre que se aumente la dosis.
- En los pacientes con dilatación aórtica y tratamiento con betabloqueante o antagonista de los receptores de la angiotensina II, se debe ser especialmente prudente antes de iniciar tratamiento para el TDAH ya que un aumento de la

frecuencia cardiaca o la tensión arterial puede ser muy perjudicial. En todo caso habría que utilizar el fármaco con menor efecto simpaticomimético como guanfacina. Hay que considerar también que al estar recibiendo un tratamiento hipotensor, una mayor disminución de tensión arterial puede no tolerarse bien.

- En caso de detectar hipertensión arterial hay que suspender el tratamiento para el TDAH y controlar con fármacos la tensión arterial antes de reanudar el tratamiento para el TDAH de forma progresiva.
- En caso de insuficiencia de la válvula mitral concomitante habrá que seguir, además, las recomendaciones recogidas en el apartado de cardiopatías congénitas de esta guía.

### 11.5 Hipertensión arterial

Los psicoestimulantes (metilfenidato y lisdexanfetamina) y la atomoxetina aumentan la tensión arterial<sup>12</sup>. Los efectos sobre la tensión arterial sistólica parecen ser significativamente más elevados con la atomoxetina cuando se compara con el metilfenidato<sup>15</sup>. Por el contrario, la guanfacina puede inducir disminuciones de la TA, especialmente de la TA sistólica. La combinación de terapia psicoestimulante con guanfacina podría atenuar los cambios cardiovasculares observados con cada uno de los fármacos en monoterapia<sup>24</sup>.

Las recomendaciones de la SECPCC en relación a la HTA son:

- Se debe tomar la TA siguiendo las normas de la Sociedad Europea de Hipertensión en lo referente a la técnica y a los valores de referencia<sup>54</sup>.
- Se debe tomar la TA antes y durante el tratamiento con los fármacos para el TDAH, con una periodicidad individualizada según lo previamente reflejado. Se debe utilizar un tamaño de manguito adecuado a la edad del paciente y establecer los percentiles de presión arterial ajustados con la talla<sup>54,59</sup>.
- Si  $TA < p95$ , se puede comenzar / continuar la medicación para el TDAH.
- Si  $TA > p95$  se debe tomar la TA de nuevo en dos ocasiones tras 10 minutos de reposo, si continúa elevada se debe disminuir la dosis o retirar temporalmente la medicación para el TDAH con control posterior de TA.
  - a. Si en el control posterior  $TA < p95$  se puede mantener/reiniciar el tratamiento.
  - b. Si en el control posterior  $TA > p95$  se debe remitir al nefrólogo infantil para realizar estudio incluyendo la monitorización ambulatoria de la TA (MAPA) de 24 horas. Si el MAPA resulta patológico se debe realizar además ECG y Ecocardiograma. Se realizará un segundo MAPA, si este resulta patológico se diagnostica de HTA y se inicia tratamiento. Si el segundo MAPA no confirma el diagnóstico de HTA se puede iniciar el tratamiento para el TDAH.
- Una vez diagnosticada la HTA e iniciado el tratamiento de la misma si se controla con valores de  $TA < p95$ , se podía iniciar/continuar el tratamiento para el TDAH.



- En todos los pacientes con cifras elevadas de tensión arterial se debe recomendar intervenciones no farmacológicas sobre el estilo de vida<sup>60</sup>: ejercicio físico, recomendaciones dietéticas (aumento de la ingesta de fruta, verdura y legumbre, utilización de productos lácteos desnatados, disminución de la ingesta de sal y azúcares), pérdida de peso si lo precisa y reducción del estrés.
- En niños con TDAH la prevalencia de ansiedad es mucho mayor que en la población general, por lo que se deben considerar todas aquellas medidas dirigidas a la reducción del estrés, o un tratamiento específico para ansiedad, si el paciente lo precisa. La ansiedad se asocia a un aumento tanto de la TA como de la frecuencia cardiaca.
- Se recomienda evitar el tratamiento farmacológico del TDAH (estimulantes o atomoxetina) en pacientes con hipertensión arterial moderada o severa<sup>39,61</sup>.
- En el caso de aparecer elevación de la presión arterial con los psicoestimulantes (metilfenidato y lisdexanfetamina) en casos individualizados podría asociarse un betabloqueante al tratamiento.
- Se debe tener en cuenta que los psicoestimulantes pueden disminuir la eficacia de los fármacos antihipertensivos, y que hay que tener precaución si se administran junto con fármacos que también aumenten las cifras de tensión arterial.
- En casos de HTA moderada se puede considerar el tratamiento con guanfacina. Es preciso recordar que la retirada de la guanfacina debe hacerse de manera paulatina, para evitar el efecto rebote de hipertensión arterial.
- Si durante el tratamiento con guanfacina aparece hipotensión ortostática mantenida o episodios sincopales, se debe reducir la dosis o cambiar a otro medicamento para el TDAH.

### 11.6 Arritmias y/o trastornos arritmogénicos

No existen estudios amplios sobre el uso de fármacos para el TDAH en pacientes con canalopatías y/o arritmias pero hay que tener en cuenta los efectos cardiológicos de éstos.

En relación al SQT, una revisión reciente sugiere la poca afectación de los fármacos para el TDAH en la prolongación del intervalo QT a no ser que se combinen con otros fármacos que lo prolonguen<sup>43</sup>.

Las recomendaciones de la SECPCC en relación a las arritmias son las siguientes:

1. Se puede iniciar el tratamiento con estimulantes o no estimulantes para el TDAH en:

- Pacientes en los que se detecta casualmente hallazgos ECG habituales en los niños y adolescentes y que no representan patología: bloqueo incompleto de rama derecha, arritmia sinusal respiratoria o marcapasos migratorio.

- Pacientes en los que se detecta casualmente hallazgos ECG de bloqueo completo de rama derecha, hemibloqueo anterior o posterior de rama izquierda, una vez que se haya excluido cardiopatía estructural.
- Pacientes asintomáticos en los que se detecta casualmente extrasistolia supraventricular monomorfa de baja densidad (<60/hora) una vez descartada patología asociada. Se recomienda la realización de Holter ECG una vez iniciado el tratamiento para comprobar si existe variación de la arritmia basal.
- Pacientes con síndrome de Brugada, dado que los momentos de máximo riesgo son los relacionados con las situaciones vagales.
- Pacientes con antecedente de taquicardias supraventriculares que no están recibiendo tratamiento antiarrítmico. En caso de persistir/reaparecer las taquicardias, puede ser una indicación de terapia mediante ablación cardiaca para su curación.
- Pacientes asintomáticos con extrasistolia ventricular monomorfa de baja densidad (<60/hora), sin formas complejas, sin cardiopatía estructural de base y con ergometría en que se demuestra la desaparición/disminución de las extrasístoles con el esfuerzo. Se recomienda la realización de Holter ECG una vez iniciado el tratamiento para comprobar si existe variación de la arritmia basal.
- Pacientes asintomáticos en los que se detecta casualmente preexcitación en un ECG y en los que se demuestra la desaparición de conducción por vía accesorio a frecuencias altas en ergometría y/o holter ECG, no siendo necesario realizar ablación de la vía accesorio previa al inicio del tratamiento.
- Pacientes asintomáticos en los que se detecta casualmente BAV de primer grado o BAV de 2º grado Mobitz I debiéndose evitar la utilización de la guanfacina.

2. El tratamiento para el TDAH se debe individualizar y consultar con un arritmólogo en los siguientes casos:

- Pacientes con Taquicardia Ventricular polimórfica catecolaminérgica (TVPC). La TVPC es una entidad poco frecuente sensible a la catecolamina por lo que una terapia estimulante no sería recomendable.
- Pacientes asintomáticos con extrasistolia ventricular monomorfa de alta densidad (>60/hora), polimorfa o con formas complejas o con cardiopatía estructural de base.
- Los pacientes asintomáticos en los que se detecta casualmente preexcitación en un ECG y en los que no se demuestre desaparición de conducción por vía accesorio a frecuencias altas en ergometría y/o holter ECG.
- Episodio previo de muerte súbita abortada.
- Historia de arritmia que requirió reanimación cardiopulmonar, cardioversión, desfibrilación o marcapasos.

- Historia de arritmia asociada con muerte súbita.

En resumen, si el paciente precisa tratamiento para el TDAH, a pesar de que tenga sustrato arrítmico, hay que valorar el perfil beneficio-riesgo del uso de fármacos de manera individualizada, considerando el adecuado desarrollo del paciente y adaptando la monitorización y los cambios de medicación a cada paciente<sup>42</sup>.

## BIBLIOGRAFIA

1. Centers for Disease Control and Prevention (CDC). Attention-deficit/hyperactivity disorder (ADHD). Disponible en: <http://www.cdc.gov/ncbddd/adhd/diagnosis.html>.
- 2 Thapar A, Cooper M, Jefferies R, Stergiakouli, E. What causes attention deficit hyperactivity disorder? *Arch. Dis. Child.* 2012. 97, 260–5.
- 3 Thapar A, Cooper M. Attention deficit hyperactivity disorder. *Lancet* 2016;387(10024):1240-50.
- 4 Santosh P. Stimulant medication to treat attention-deficit/hyperactivity disorder. *BMJ* 2017;358:j2945.
- 5 Schmidt S, Petermann F. Developmental psychopathology: attention deficit hyperactivity disorder (ADHD). *BMC Psychiatry* 2009;9:58. DOI: 10.1186/1471-244X-9-58
- 6 Ramos-Quiroga JA, Bosch Munsó R, Castells Cervelló X, Nogueira Morais M, García Giménez E, Casas Balagué M. Trastorno por déficit de atención con hiperactividad en adultos: caracterización clínica y terapéutica. *Rev Neuro.* 2006;42(10);600-6
- 7 Catalá-López F, Peiró S, Ridaó M, Sanfeliu-Gimeno G, Gènova-Maleras R, Catalá MA. Prevalence of attention deficit hyperactivity disorder among children and adolescents in Spain: A systematic review and meta-analysis of epidemiological studies. *BMC Psychiatry* 2012;12:168.
8. Yamada DC, Porter AA, Conway JL, LeBlanc JC, Shea SE, Hancock-Friesen CL, ET AL. Early repair of congenital heart disease associated with increased risk of ADHD symptoms. *Can J Cardiol* 2013; 29:1623–1628.
9. Hansen E, Poole TA, Nguyen V, Lerner M, Wigal T, Shannon K, et al. Prevalence of ADHD symptoms in patients with congenital heart disease. *Pediatr Int* 2012; 54:838–843.
10. Shillingford AJ, Glanzman MM, Ittenbach RF, Clancy RR, Gaynor JW, Wernovsky G. Inattention, hyperactivity and school performance in a population of school-aged children with complex congenital heart disease. *Pediatrics* 2008; 12:e759–e767.
11. Hennissen L, Bakker MJ, Banaschewski T, Carucci S, Coghill D, Danckaerts M, et al. Cardiovascular Effects of Stimulant and Non-Stimulant Medication for Children and Adolescents with ADHD: A Systematic Review and Meta-Analysis of Trials of Methylphenidate, Amphetamines and Atomoxetine. *CNS Drugs* (2017) 31:199–215
12. Brown KA, Samuel S, Patel DR. Pharmacologic management of attention deficit hyperactivity disorder in children and adolescents: A review for practitioners. *Transl Pediatr.* 2018 Jan; 7(1): 36–47.
13. Berger S. Attention deficit hyperactivity disorder medications in children with heart disease. *Current Opinion in Pediatrics.* 2016 Oct. 28 (5): 607-612.

14. Hamilton RM, Rosenthal E, Hulpke-Wette M, Graham JG, Sergeant J. European Network of Hyperkinetic Disorders. Cardiovascular considerations of attention deficit hyperactivity disorder medications: a report of the European Network on Hyperactivity Disorders work group, European Attention Deficit Hyperactivity Disorder Guidelines Group on attention deficit hyperactivity disorder drug safety meeting. *Cardiol Young*. 2012 Feb;22(1):63-70.
15. Liang EF, Lim SZ, Tam WW, Ho CS, Zhang MW, McIntyre RS, ET AL. The Effect of Methylphenidate and Atomoxetine on Heart Rate and Systolic Blood Pressure in Young People and Adults with Attention-Deficit Hyperactivity Disorder (ADHD): Systematic Review, Meta-Analysis, and Meta-Regression. *Int J Environ Res Public Health*. 2018 Aug 20;15(8).
16. Hammerness PG, Perrin JM, Shelley-Abrahamson R, E. Wilens, T. Cardiovascular Risk of Stimulant Treatment in Pediatric Attention-Deficit/ Hyperactivity Disorder: Update and Clinical Recommendations. *Journal of the American Academy of Child and Adolescent Psychiatry* (2011) 50: 978–990.
17. Samuels JA, Franco K, Wan F, Sorof JM. Effect of stimulants on 24-h ambulatory blood pressure in children with ADHD: a double-blind, randomized, cross-over trial. *Pediatr Nephrol* (2006) 21:92–95.
18. Graham J, Banaschewski T, Buitelaar J, Coghill D, Danckaerts M, Dittmann RW, ET AL. European Guidelines Group. European guidelines on managing adverse effects of medication for ADHD. *Eur Child Adolesc Psychiatry*. 2011 Jan;20(1):17-37.
19. Cortese S, Holtmann M, Banaschewski T, Buitelaar J, Coghill D, Danckaerts M, ET AL. European ADHD Guidelines Group.et al. Practitioner review: current best practice in the management of adverse events during treatment with ADHD medications in children and adolescents. *J Child Psychol Psychiatry*. 2013;54:227-246.
20. Winterstein AG, Gerhard T, Kubilis P, Saidi A, Linden S, Crystal S, et al. Cardiovascular safety of central nervous system stimulants in children and adolescents: population based cohort study. *BMJ* 2012, 345:e4627.
21. Kelly AS, Rudser KD, Dengel DR, Kaufman CL, Reiff MI, Norris AL, et al. Cardiac autonomic dysfunction and arterial stiffness among children and adolescents with attention deficit hyperactivity disorder treated with stimulants. *J Pediatr* 2014;165: 755–9.
22. Martinez-Raga J, Knecht C, Szerman N, Martinez MI. Risk of serious cardiovascular problems with medications for attention-deficit hyperactivity disorder. *CNS Drugs* 2013;27:15-30.
23. Loghin C, Haber H, Beasley CM Jr, Kothare PA, Kauffman L, April J, Jin L, et al. Effects of atomoxetine on the QT interval in healthy CYP2D6 poor metabolizers. *Br J Clin Pharmacol*. 2013 Feb;75(2):538-49.
24. Sayer G, McGough J, Levitt J, Cowen J, Sturm A, Castelo E. et al. Acute and long-term cardiovascular effects of stimulant, guanfacine, and combination therapy for attention-deficit/hyperactivity Disorder. *J Child Adolesc Psychopharmacol* (2016) 26: 882–888.

25. Martinez-Raga, J., Knecht, C. and de Alvaro, R. (2015) Profile of guanfacine extended-release and its potential in the treatment of attention deficit hyperactivity disorder. *Neuropsychiatr Dis Treat* (2015) 11: 1359–1370.
26. Fay TB, Alpert MA. Cardiovascular Effects of Drugs Used to Treat Attention Deficit/Hyperactivity Disorder Part 1: Epidemiology, Pharmacology, and Impact on Hemodynamics and Ventricular Repolarization. *Cardiol Rev*. 2018 Oct 25. [Epub ahead of print]
27. KimMunk, Lise Gormsen, Won Yong Kim, Niels Holmark Andersen. Cardiac Arrest following a Myocardial Infarction in a Child Treated with Methylphenidate. Hindawi Publishing Corporation *Case Reports in Pediatrics* Volume 2015, Article ID 905097
28. Tollofsrud C, Hoel T. A young man with acute dilated cardiomyopathy. *Tidsskr Nor Laegeforen*, 2006, 126:1338-9.
29. Nymark TB, Hovland A, Bjørnstad H, Nielsen EW. A young man with acute dilated cardiomyopathy associated with methylphenidate. *Vascular Health and Risk Management* 2008;4(2) 477–479.
30. Westover AN, Halm EA. Do prescription stimulants increase the risk of adverse cardiovascular events?: a systematic review. *BMC Cardiovasc Disord*. 2012;12:41.
31. Winterstein AG. Use of ADHD drugs in children and Young adults does not increase risk of serious cardiovascular adverse events compared with non-use. *Evid Based Mental Health*. 2012;15(2):43.
32. Gould MS, Walsh BT, Munfakh JL, Kleinman M, Duan N, Olfson M, et al. Sudden death and use of stimulant medications in youths. *Am J Psychiatry*, 2009;166(9):992–1001.
33. Dalsgaard S, Kvist AP, Leckman JF, Nielsen HS, Simonsen M. Cardiovascular safety of stimulants in children with attention-deficit/hyperactivity disorder: a nationwide prospective cohort study. *J Child Adolesc Psychopharmacol*. 2014;24(6):302–10.
34. Cooper WO, Habel LA, Sox CM, Chan KA, Arbogast PG, Cheetham TC, et al. ADHD drugs and serious cardiovascular events in children and young adults. *N Engl J Med*. 2011;365(20):1896–904.
35. Habel LA, Cooper WO, Sox CM, Chan KA, Fireman BH, Arbogast PG, et al. ADHD medications and risk of serious cardiovascular events in young and middle-aged adults. *JAMA*. 2011;306(24):2673–83.
36. Schelleman H, Bilker WB, Strom BL, Kimmel SE, Newcomb C, Guevara JP, et al. Cardiovascular events and death in children exposed and unexposed to ADHD agents. *Pediatrics*. 2011;127(6):1102–10.
37. Alexander M. PACES survey. 2011 Presented at the Heart Rhythm Society annual meeting.
38. National Institute for Health and Care Excellence (NICE). Attention deficit hyperactivity disorder. National Clinical Practice Guideline Number 72. London: The British Psychological Society & The Royal College of Psychiatrists, 2016.

39. Canadian ADHD Resource Alliance (CADDRA): Canadian ADHD Practice Guidelines, Fourth Edition, Toronto ON; CADDRA, 2018.
40. Anjan S, Batra, Mark E, Alexander, Michael J. Silka. Attention-Deficit/Hyperactivity Disorder, Stimulant Therapy, and the Patient with Congenital Heart Disease: Evidence and Reason. *Pediatr Cardiol* (2012) 33:394–401.
41. Stuart Berger. Attention déficit hyperactivity disorder medications in children with heart disease. *Curr Opin Pediatr* 2016, 28:607–612.
42. Vetter VL, Elia J, Erickson C, Berger S, Blum N, Uzark K, et al. Cardiovascular monitoring of children and adolescents with heart disease receiving medications for attention deficit/hyperactivity disorder [corrected]: a scientific statement from the American Heart Association Council on Cardiovascular Disease in the Young Congenital Cardiac Defects Committee and the Council on Cardiovascular Nursing. *Circulation* 2008;117:2407-23.
43. Rohatgi RK, Bos JM, Ackerman J. Stimulant therapy in children with attention-deficit/hyperactivity disorder and concomitant long QT syndrome: A safe combination? *Heart Rhythm*. 2015 August ; 12(8): 1807–1812.
44. Attention deficit hyperactivity disorder: diagnosis and management NICE guideline March 2018 [nice.org.uk/guidance/ng87](http://nice.org.uk/guidance/ng87).
45. Bolea-Alamañac B, Nutt DJ, Adamou M, Asherson P, Bazire S, Coghill D, et al. Evidence-based guidelines for the pharmacological management of attention deficit hyperactivity disorder: update on recommendations from the British Association for Psychopharmacology. *J Psychopharmacol*. 2014 Mar;28(3):179-203.
46. Lurbe E, Cifkova R, Cruickshank JK, Dillon MJ, Ferreira I, Invitti C, et al. Management of high blood pressure in children and adolescents: recommendations of the European Society of Hypertension. *J Hypertens* 2009; 27: 1719–1742.
47. Grupo de trabajo de la Guía de Práctica Clínica sobre el Trastorno por Déficit de Atención con Hiperactividad (TDAH) en Niños y Adolescentes. Fundació Sant Joan de Déu, coordinador. Guía de Práctica Clínica sobre el Trastorno por Déficit de Atención con Hiperactividad (TDAH) en Niños y Adolescentes. Plan de Calidad para el Sistema Nacional de Salud del Ministerio de Sanidad, Política Social e Igualdad. Agència d'Informació, Avaluació i Qualitat (AIAQS) de Catalunya; 2010. Guías de Práctica Clínica en el SNS: AATRM Nº 2007/18.
48. Ficha técnica de Elvanse® del Centro de Información online de Medicamentos de la AEMPS – CIMA [base de datos en Internet®]. Madrid, España: Agencia española de medicamentos y productos sanitarios (fecha de acceso 04/02/19) <http://www.aemps.gob.es/>
49. Ficha técnica de Intuniv® del Centro de Información online de Medicamentos de la AEMPS – CIMA [base de datos en Internet®]. Madrid, España: Agencia española de medicamentos y productos sanitarios (fecha de acceso 04/02/19) <http://www.aemps.gob.es/>

50. Ficha técnica de Metilfenidato del Centro de Información online de Medicamentos de la AEMPS – CIMA [base de datos en Internet®]. Madrid, España: Agencia española de medicamentos y productos sanitarios (fecha de acceso 04/02/19) <http://www.aemps.gob.es/>
51. Ficha técnica de Strattera® del Centro de Información online de Medicamentos de la AEMPS – CIMA [base de datos en Internet®]. Madrid, España: Agencia española de medicamentos y productos sanitarios (fecha de acceso 04/02/19) <http://www.aemps.gob.es/>
52. Aparicio Rodrigo M, González de Dios J, Ramos Lizana J. Se puede tratar el déficit de atención con hiperactividad sin hacer un electrocardiograma. *Evid Pediatr*. 2011;7:80.
53. Guidelines, N. Attention deficit hyperactivity disorder: diagnosis and management of ADHD in children, young people and adults. Leicester: The British Psychological Society & The Royal College of Psychiatrists; 2009.
54. Lurbe E, Agabiti-Rosei E, Cruickshank JK, Dominiczak A, Erdine S, Hirth A, et al. 2016 European Society of Hypertension guidelines for the management of high blood pressure in children and adolescents. *J Hypertens*. 2016;34:1887–1920.
55. Karpuz, Derya; Hallioglu, Olgu; Toros, Fevziye; Tasdelen, Bahar. The effect of metilpheniydate, risperidone and combination therapy on ECG in children with attention-deficit hyperactivity disorder. *J Electrocardiol* 2017; 50(4): 410-415
56. Gothelf D, Gruber R, Presburger G, Dotan I, Brand-Gothelf A, Burg M, et al. Methylphenidate treatment for attention-deficit/hyperactivity disorder in children and adolescents with velocardiofacial syndrome: an open-label study. *J Clin Psychiatry* 2003 64:1163–1169
57. Ekhomu O, Naheed ZJ. Aortic involvement in pediatric Marfan syndrome: A review. *Pediatr Cardiol*. 2015 Jun;36(5):887-95.
58. Hofman, K. J., Bernhardt, B. A., Pyeritz, R. E., Opitz, J. M., & Reynolds, J. F. Marfan syndrome: Neuropsychological aspects. *American Journal of Medical Genetics*, 1988 331-338.
59. De la Cerda Ojeda F, Herrero Hernando C. Hipertensión arterial en niños y adolescentes. *Protoc diagn ter pediatr*. 2014;1:171-89.
60. Flynn JT, Kaelber DC, Baker-Smith CM, Blowey D, Carroll AE, Daniels SR, et al. Clinical Practice Guideline for Screening and Management of High Blood Pressure in Children and Adolescents. *Pediatrics*. 2017 Sep;140(3). pii: e20171904. doi: 10.1542/peds.2017-1904.
61. Martinez-Raga J, Ferreros A, Knecht C., de Alvaro R., Carabal E. Attention-deficit hyperactivity disorder medication use: factors involved in prescribing, safety aspects and outcomes. *Ther Adv Drug Saf* 2017, 8(3): 87–99.
62. Hammerness PG, Surman CBH, Chilton A. Adult attention-deficit/ hyperactivity disorder treatment and cardiovascular implications. *Curr Psychiatry Rep*. 2011;13(5):357–63. 22.
